# Supplementary material for: Aging exacerbates oxidative stress and liver fibrosis in an animal model of Down Syndrome
Source: publisher site journal article supplement (doi:10.18632/aging.205970), 2024-06-26
Supplement: Supplementary file [file aging-v16-205970-supplementary-material-SD1.pdf]

**SUPPLEMENTARY FIGURE**

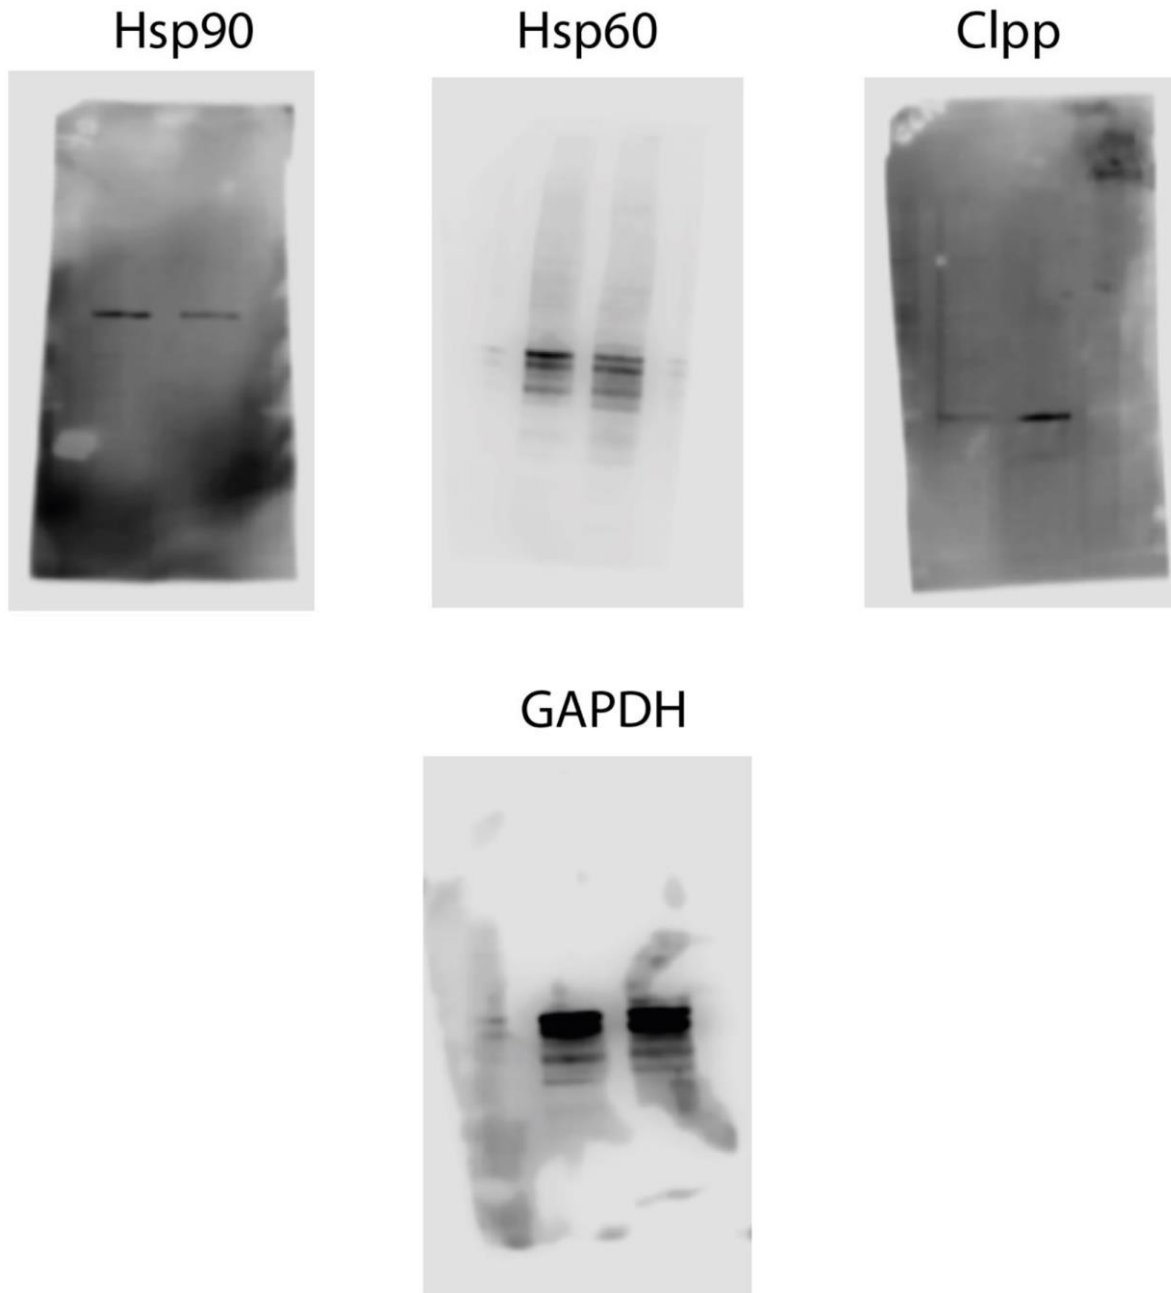

**Supplementary Figure 1. Western blot analysis on Hsp90, Hsp60, GAPDH and Clpp.** Full membranes derived by the western blot analysis on Hsp90, Hsp60, GAPDH and Clpp.
